# Supplementary material
Source: Springer Nature journal article supplement (https://www.springermedizin.de/resource/supplementary/12957_2012_1344_MOESM1_ESM.pdf/9562312)

**a** 2006.7.31

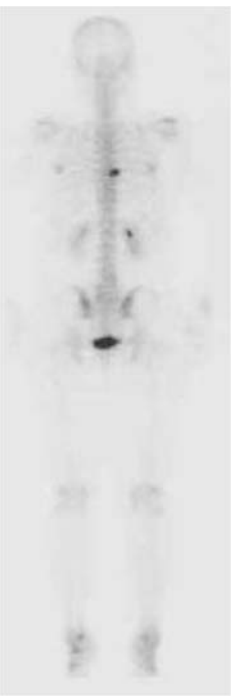

**b** 2006.8.14 MRI

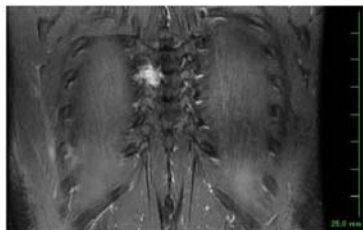

**c** 2006.8.26 SPECT-CT

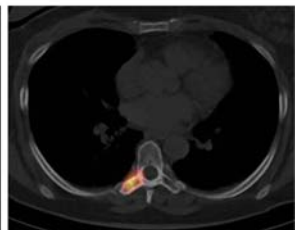

**d** 2006.7.31

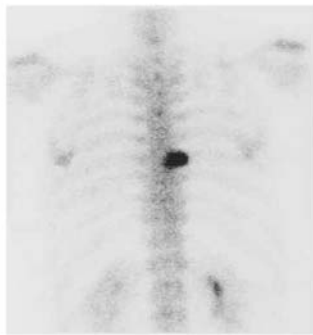

**e** 2007.8.23

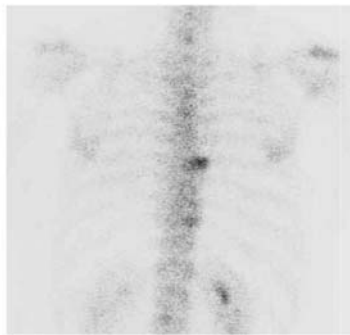

**f** 2010.12.2

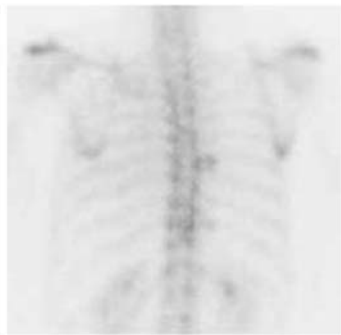

Supplement: MOESM1 [file 9562312]
